# Supplementary material for: Remote Sensing with UAVs for Modeling Floods: An Exploratory Approach Based on Three Chilean Rivers
Source: MDPI journal article supplement (doi:10.3390/w15081502), 2023-04-12
Supplement: s1 [file s1]

Supplementary Material

# Remote Sensing with UAVs for Modeling Floods: An Exploratory Approach Based on Three Chilean Rivers

Robert Clasing <sup>1,2</sup>, Enrique Muñoz <sup>1,2,\*</sup>, José Luis Arumí <sup>3,4</sup>, Diego Caamaño <sup>1</sup>, Hernán Alcayaga <sup>5</sup>  
and Yelena Medina <sup>1,2</sup>

<sup>1</sup> Department of Civil Engineering, Universidad Católica de la Santísima Concepción, Concepción 4090541, Chile; rjclasing@ing.ucsc.cl (R.C.)

<sup>2</sup> Centro de Investigación en Biodiversidad y Ambientes Sustentables (CIBAS), Universidad Católica de la Santísima Concepción, Concepción 4090541, Chile

<sup>3</sup> Department of Water Resources, Universidad de Concepción, Chillán 3812120, Chile

<sup>4</sup> Centro Fondap CRHIAM, Concepción 4070411, Chile

<sup>5</sup> Escuela de Ingeniería en Obras Civiles, Universidad Diego Portales, Santiago 8370109, Chile

\* Correspondence: emunozo@ucsc.cl; Tel.: +56-41-2345355

## Supplementary Material

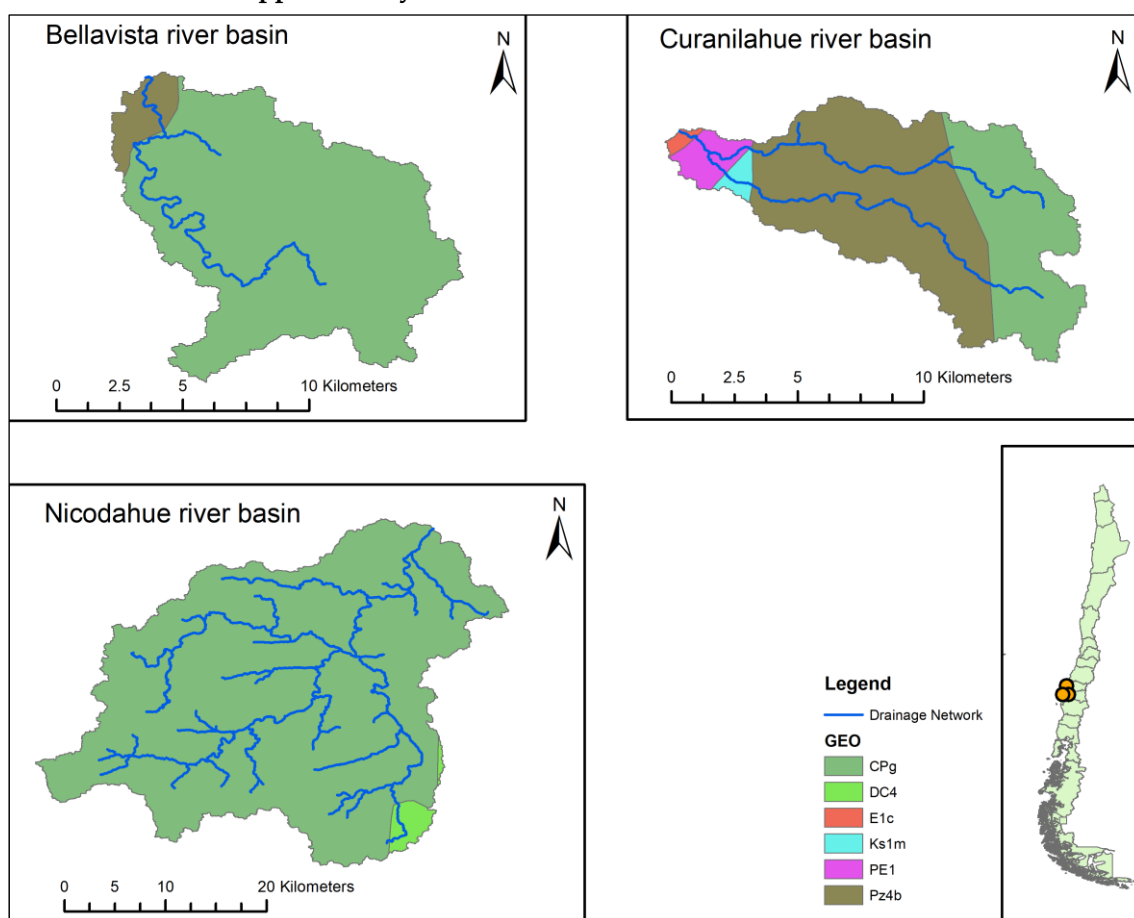

**Figure S1.** Maps with the geology of the study sites at watershed scale.
